# Supplementary material for: Power generation from nanostructured PbTe-based thermoelectrics: comprehensive development from materials to modules
Source: Royal Society of Chemistry journal article supplement (doi:10.1039/c5ee02979a), 2015-11-27
Supplement: c5ee02979a1.pdf [file c5ee02979a1.pdf]

**Electronic supplementary information**

**for**

**Power generation from nanostructured PbTe-based thermoelectrics: Comprehensive development from materials to modules**

Xiaokai Hu,<sup>a,‡</sup> Priyanka Jood,<sup>a,‡</sup> Michihiro Ohta,<sup>a,\*</sup> Masaru Kunii,<sup>a</sup> Kazuo Nagase,<sup>a</sup> Hirotaka Nishiate,<sup>a</sup> Mercouri G. Kanatzidis,<sup>b,c</sup>, Atsushi Yamamoto<sup>a</sup>

<sup>a</sup>Research Institute for Energy Conservation, National Institute of Advanced Industrial Science and Technology (AIST), Tsukuba, Ibaraki 305-8568, Japan

<sup>b</sup>Department of Chemistry, Northwestern University, Evanston, Illinois 60208, USA

<sup>c</sup>Materials Science Division, Argonne National Laboratory, Argonne, Illinois 60439, USA

<sup>‡</sup>X.H. and P.J contributed equally to this work.

\*Corresponding author: ohta.michihiro@aist.go.jp

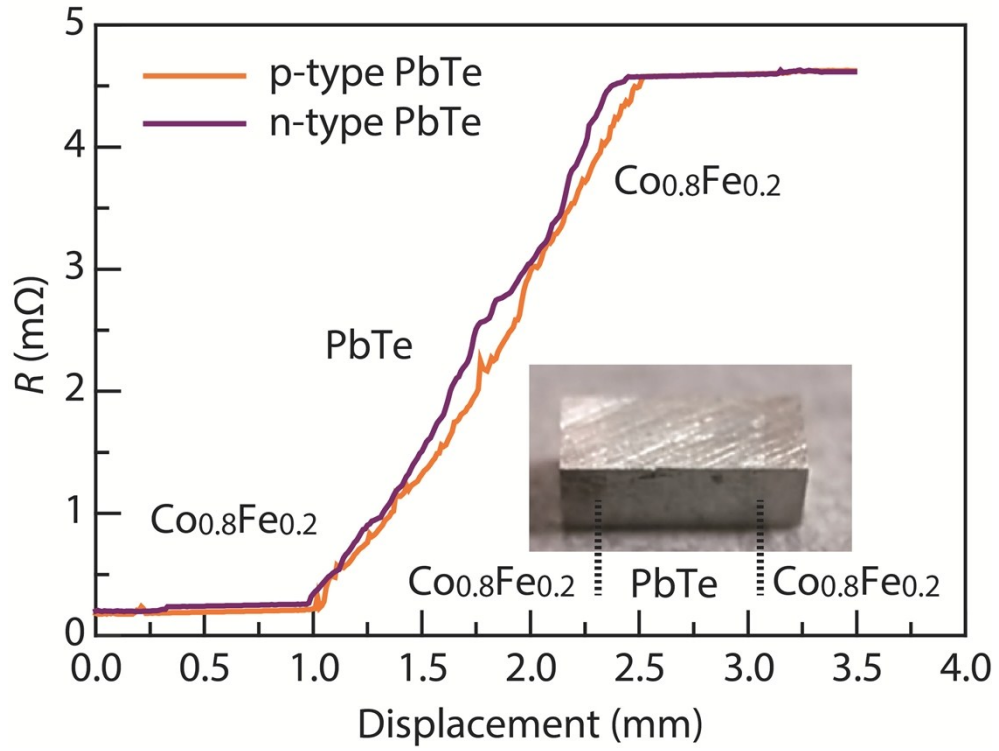

**Figure S1**

Electrical resistance of PbTe–2% MgTe doped with 4% Na (*p*-type) and PbTe doped with 0.2 %  $\text{PbI}_2$  (*n*-type) legs with  $\text{Co}_{0.8}\text{Fe}_{0.2}$  diffusion layers measured by line scanning along the length at room temperature. Few changes have been found for both samples.

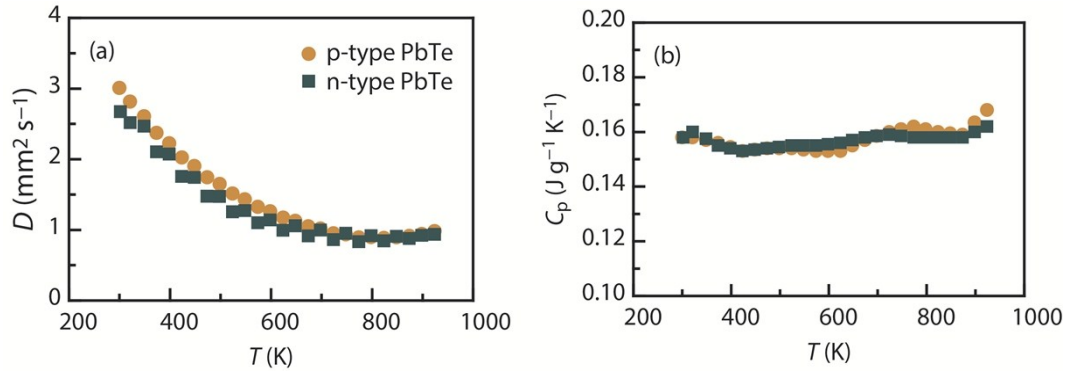

**Figure S2**

Temperature dependence of the (a) thermal diffusivity ( $D$ ) and (b) heat capacity ( $C_p$ ) for the PbTe–2% MgTe doped with 4% Na ( $p$ -type) and PbTe doped with 0.2 %  $\text{PbI}_2$  ( $n$ -type).

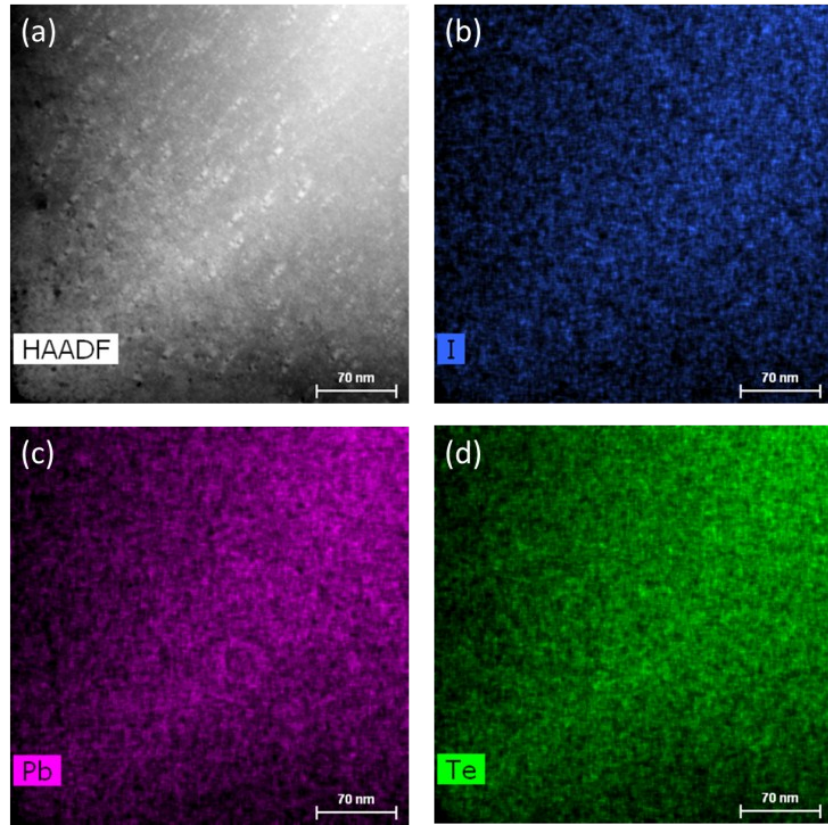

**Figure S3**

(a) High-angle annular dark-field scanning transmission electron microscope image of *n*-type PbTe doped with 0.2% PbI<sub>2</sub>. (b), (c), and (d) Energy dispersive elemental mapping of the area shown in (a) for elements I, Pb, and Te.

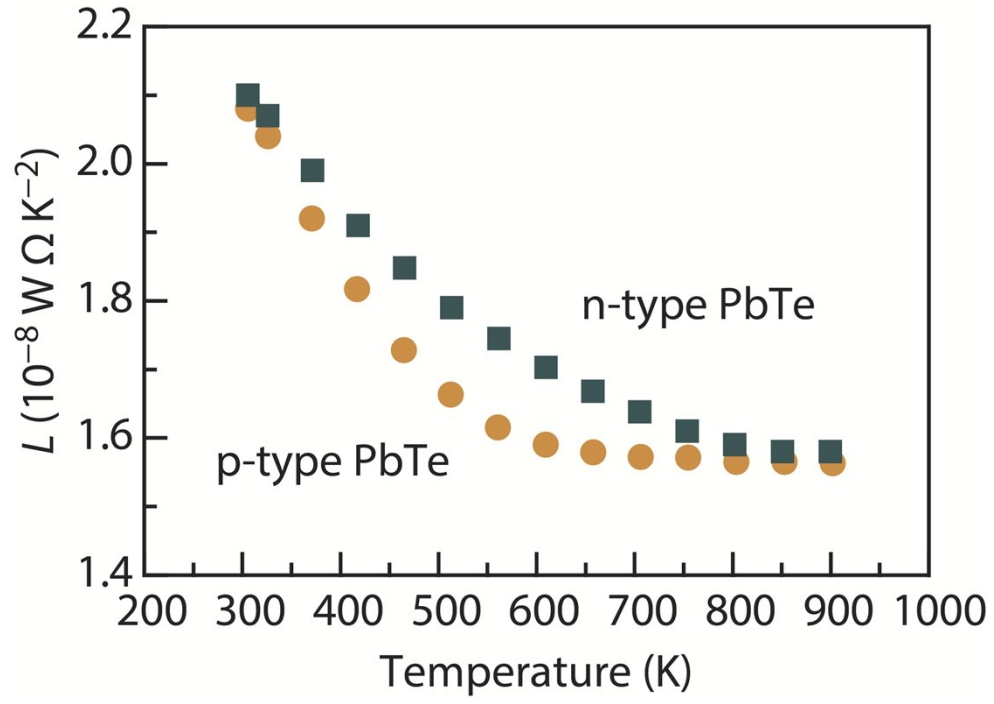

**Figure S4**

Temperature dependence of the calculated Lorenz number ( $L$ ) of *p*-type PbTe–2% MgTe doped with 4% Na and *n*-type PbTe doped with 0.2% PbI<sub>2</sub>.

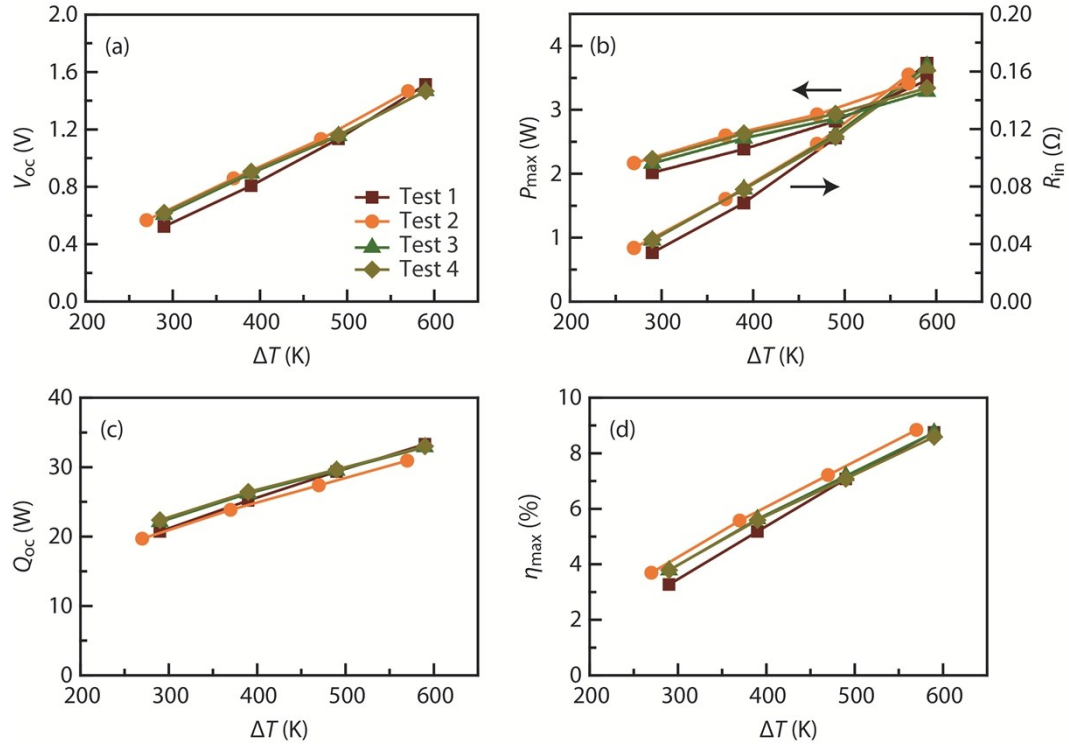

**Figure S5**

Measured (a) open-circuit voltage ( $V_{oc}$ ), (b) maximum power output ( $P_{max}$ ) and internal resistance ( $R_{in}$ ), (c) open-circuit heat flow ( $Q_{oc}$ ), and (d) maximum conversion efficiency ( $\eta_{max}$ ) of the nanostructured PbTe-based module (PbTe–2% MgTe doped with 4% Na (*p*-type) and PbTe doped with 0.2 % PbI<sub>2</sub> (*n*-type)) as functions of temperature difference ( $\Delta T$ ). The module testing was performed four times on the same module with  $T_h$  at 873, 773, 673, and 573 K, and  $T_c$  at 283 K except  $T_c$  at 303 K for the second measurement to confirm the reproducibility.

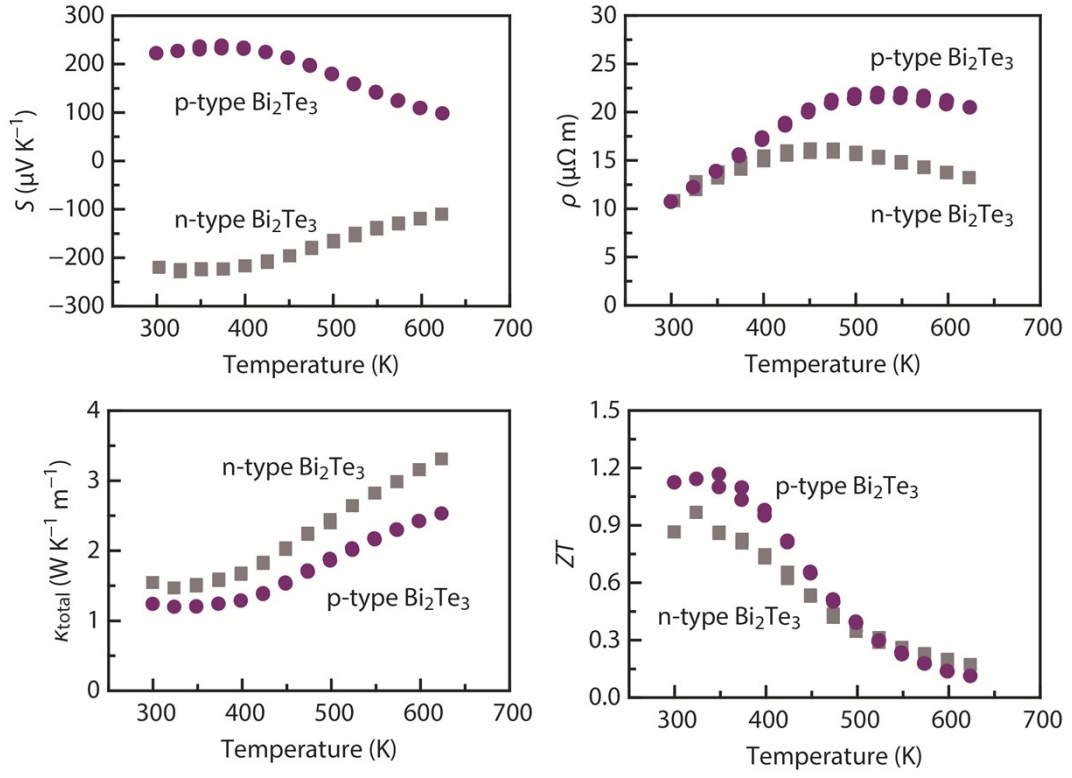

**Figure S6**

Temperature dependence of the (a) Seebeck coefficient ( $S$ ), (b) electrical resistivity ( $\rho$ ), (c) total thermal conductivity ( $\kappa_{\text{total}}$ ), and thermoelectric figure of merit ( $ZT$ ) of commercial *p*- and *n*-type  $\text{Bi}_2\text{Te}_3$  which was used to fabricate the segmented module.

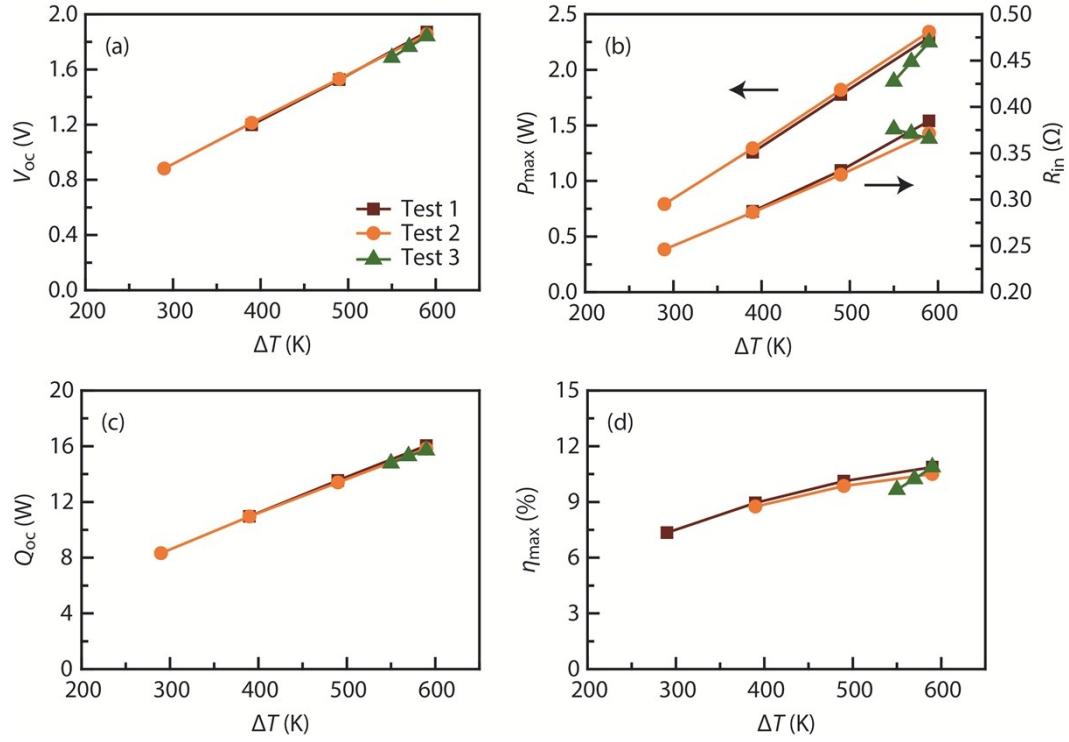

**Figure S7**

Measured (a) open-circuit voltage ( $V_{oc}$ ), (b) maximum power output ( $P_{max}$ ) and internal resistance ( $R_{in}$ ), (c) open-circuit heat flow ( $Q_{oc}$ ), and (d) maximum conversion efficiency ( $\eta_{max}$ ) of the segmented  $\text{Bi}_2\text{Te}_3$ /nanostructured PbTe ( $\text{Bi}_2\text{Te}_3/\text{PbTe-MgTe}$  ( $p$ -type)– $\text{Bi}_2\text{Te}_3/\text{PbTe}$  ( $n$ -type)) module as functions of temperature difference ( $\Delta T$ ). The first and second measurements are performed with  $T_c$  at 283 K and  $T_h$  at 873, 773, 673, and 573 K, while the third measurement is done with  $T_h$  at 873 K and  $T_c$  at 283, 303, and 323 K.

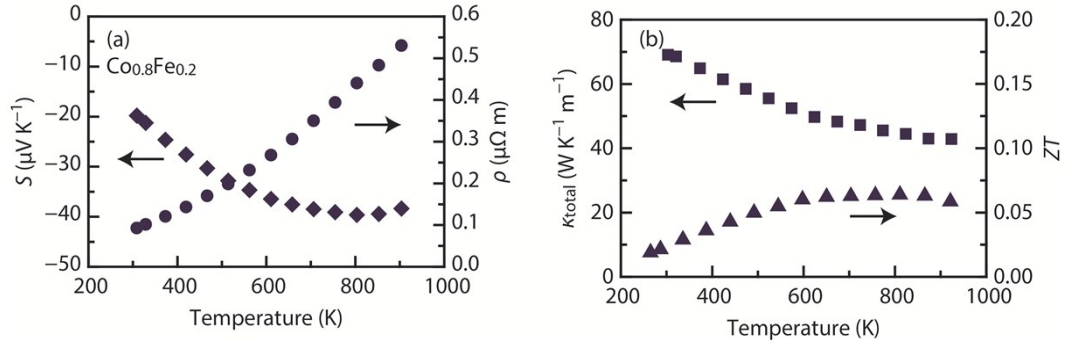

**Figure S8**

Temperature dependence of the (a) electrical resistivity ( $\rho$ ) and Seebeck coefficient ( $S$ ) and (b) total thermal conductivity ( $\kappa_{\text{total}}$ ) and thermoelectric figure of merit ( $ZT$ ) of  $\text{Co}_{0.8}\text{Fe}_{0.2}$  which was used as diffusion layer for PbTe legs.

**Table S1**

Density ( $d$ ) of sintered samples prepared in this study. The theoretical  $d$  of pure PbTe is  $8.24 \text{ g cm}^{-3}$ .

| Chemical composition                   | $d \text{ (g cm}^{-3}\text{)}$ |
|----------------------------------------|--------------------------------|
| PbTe–2% MgTe doped with 4% Na          | 8.08                           |
| PbTe doped with 0.2 % PbI <sub>2</sub> | 7.82                           |

**Table S2**

Material's properties and geometrical parameters used for simulating power generation of the nanostructured PbTe-based module (PbTe–2% MgTe doped with 4% Na (*p*-type) and PbTe doped with 0.2 % PbI<sub>2</sub> (*n*-type)).

| Material                                                          | Seebeck coefficient (V/K)  | Electrical conductivity (S/m)                            | Thermal conductivity (W/(m·K)) | Size (mm)   |
|-------------------------------------------------------------------|----------------------------|----------------------------------------------------------|--------------------------------|-------------|
| <i>p</i> -PbTe-based thermoelectric material                      | $S_p(T)^{(1)}$             | $1/\rho_p(T)^{(2)}$                                      | $k_p(T)^{(3)}$                 | 2×2×2.2     |
| <i>n</i> -PbTe-based thermoelectric material                      | $S_n(T)^{(1)}$             | $1/\rho_n(T)^{(2)}$                                      | $k_n(T)^{(3)}$                 | 2×2×2.2     |
| Co <sub>0.8</sub> Fe <sub>0.2</sub> diffusion barrier (Figure S8) | $S_{\text{CoFe}}(T)^{(1)}$ | $1/\rho_{\text{CoFe}}(T)^{(2)}$                          | $k_{\text{CoFe}}(T)^{(3)}$     | 2×2×0.3     |
| Cu interconnecting electrode                                      | -10 <sup>-6</sup>          | 8×10 <sup>7</sup>                                        | 400                            | 5×2×1 (0.1) |
| Cu lead wire                                                      | -10 <sup>-6</sup>          | 8×10 <sup>9</sup>                                        | 0.01                           | 1×1×4.8     |
| Electrical load resistance                                        | -10 <sup>-6</sup>          | 10 <sup>-4</sup> ,<br>10 <sup>4</sup> ~2×10 <sup>5</sup> | 200                            | 1×8×1       |
| Heat sink                                                         | NA                         | NA                                                       | 200                            | 1×8×0.5     |
| Aluminum substrate                                                | NA                         | NA                                                       | 200                            | 18×15×1     |
| Insulated polymer film                                            | NA                         | NA                                                       | 10                             | 18×15×0.05  |

  

(1)

$$S_p(T) = -3.1591 \times 10^{-13} T^3 - 8.1391 \times 10^{-11} T^2 + 7.6928 \times 10^{-7} T - 1.5799 \times 10^{-4}$$

$$S_n(T) = 8.8024 \times 10^{-13} T^3 - 1.4263 \times 10^{-9} T^2 + 4.5166 \times 10^{-7} T - 1.1317 \times 10^{-4}$$

$$S_{\text{CoFe}}(T) = 1.1430 \times 10^{-16} T^3 + 7.9744 \times 10^{-11} T^2 - 1.2843 \times 10^{-7} T + 1.2257 \times 10^{-5}$$

(2)

$$\rho_p(T) = -1.5365 \times 10^{-13} T^3 + 2.5123 \times 10^{-10} T^2 - 8.5114 \times 10^{-8} T + 1.1182 \times 10^{-5}$$

$$\rho_n(T) = -1.9315 \times 10^{-14} T^3 + 1.2018 \times 10^{-10} T^2 - 7.6049 \times 10^{-8} T + 1.8911 \times 10^{-5}$$

$$\rho_{\text{CoFe}}(T) = -5.7185 \times 10^{-16} T^3 + 1.5707 \times 10^{-12} T^2 - 4.8920 \times 10^{-10} T + 1.1294 \times 10^{-7}$$

(3)

$$k_p(T) = -1.0899 \times 10^{-8} T^3 + 3.0486 \times 10^{-5} T^2 - 2.7721 \times 10^{-2} T + 9.3803 \times 10^0$$

$$k_n(T) = -1.0776 \times 10^{-8} T^3 + 2.9196 \times 10^{-5} T^2 - 2.5897 \times 10^{-2} T + 8.7124 \times 10^0$$

$$k_{\text{CoFe}}(T) = 1.8876 \times 10^{-8} T^3 + 2.0201 \times 10^{-5} T^2 - 9.0894 \times 10^{-2} T + 9.4741 \times 10^1$$
